# Supplementary material for: RNA-Seq-Based Whole Transcriptome Analysis of IPEC-J2 Cells During Swine Acute Diarrhea Syndrome Coronavirus Infection
Source: Front Vet Sci. 2020 Aug 13;7:492. doi: 10.3389/fvets.2020.00492 (PMC7438718; doi:10.3389/fvets.2020.00492)
Supplement: Supplementary file 9 [file Table_9.xlsx]

## Sheet: Sheet1
Table S9. GO functional categorization of differentially expressed genes regulated in the samples of 48 hpi
Category	GO ID	Description	p-value	padj-value	Count	Up-regulated count	Down-regulated count
BP	GO:0006954	inflammatory response	5.06e-11	5.56e-08	23	22	1
BP	GO:0006955	immune response	3.05e-10	1.68e-07	30	30	0
BP	GO:0002376	immune system process	1.11e-08	4.05e-06	33	33	0
BP	GO:0006952	defense response	1.69e-08	4.64e-06	28	27	1
BP	GO:0034097	response to cytokine	2.85e-08	6.27e-06	20	18	2
BP	GO:0050896	response to stimulus	1.35e-07	1.86e-05	64	57	7
BP	GO:0071345	cellular response to cytokine stimulus	1.24e-07	1.86e-05	18	17	1
BP	GO:0019221	cytokine-mediated signaling pathway	1.29e-07	1.86e-05	16	15	1
BP	GO:0002682	regulation of immune system process	2e-07	2.45e-05	21	21	0
BP	GO:0048583	regulation of response to stimulus	2.62e-07	2.88e-05	38	35	3
BP	GO:0002684	positive regulation of immune system process	5.62e-07	5.62e-05	18	18	0
BP	GO:0051716	cellular response to stimulus	6.86e-07	6.28e-05	55	49	6
BP	GO:0071356	cellular response to tumor necrosis factor	1.14e-06	9.66e-05	9	9	0
BP	GO:0006950	response to stress	1.92e-06	0.000150866	37	34	3
BP	GO:0007165	signal transduction	2.09e-06	0.000153312	48	44	4
BP	GO:0034612	response to tumor necrosis factor	2.26e-06	0.00015508	9	9	0
BP	GO:0048584	positive regulation of response to stimulus	3.18e-06	0.000196378	24	23	1
BP	GO:0001816	cytokine production	3.22e-06	0.000196378	15	14	1
BP	GO:0023052	signaling	5.22e-06	0.000286947	48	44	4
BP	GO:0044700	single organism signaling	5.22e-06	0.000286947	48	44	4
BP	GO:0007154	cell communication	7.72e-06	0.000404077	48	44	4
BP	GO:0009605	response to external stimulus	1.23e-05	0.000563844	26	22	4
BP	GO:0051247	positive regulation of protein metabolic process	1.21e-05	0.000563844	21	20	1
BP	GO:0031347	regulation of defense response	1.19e-05	0.000563844	12	11	1
BP	GO:0043491	protein kinase B signaling	1.47e-05	0.000646735	7	7	0
BP	GO:0007275	multicellular organism development	1.67e-05	0.000687283	36	31	5
BP	GO:0010646	regulation of cell communication	1.75e-05	0.000687283	31	28	3
BP	GO:0009966	regulation of signal transduction	1.7e-05	0.000687283	30	28	2
BP	GO:0023051	regulation of signaling	1.98e-05	0.000750988	31	28	3
BP	GO:0070887	cellular response to chemical stimulus	2.24e-05	0.000820571	31	28	3
BP	GO:0071310	cellular response to organic substance	2.41e-05	0.000853639	27	24	3
BP	GO:0010469	regulation of receptor activity	4.36e-05	0.00149614	18	17	1
BP	GO:0048856	anatomical structure development	5.23e-05	0.00163117	38	33	5
BP	GO:0050776	regulation of immune response	5.34e-05	0.00163117	13	13	0
BP	GO:0002460	adaptive immune response based on somatic recombination of immune receptors built from immunoglobulin superfamily domains	4.91e-05	0.00163117	9	9	0
BP	GO:0030217	T cell differentiation	5.24e-05	0.00163117	6	6	0
BP	GO:0065009	regulation of molecular function	8.09e-05	0.0024041	34	30	4
BP	GO:0002252	immune effector process	8.76e-05	0.00253465	13	13	0
BP	GO:0001817	regulation of cytokine production	9.51e-05	0.00268116	12	11	1
BP	GO:0002521	leukocyte differentiation	0.000106269	0.00291973	9	9	0
BP	GO:0051246	regulation of protein metabolic process	0.000109952	0.00292482	27	26	1
BP	GO:1903706	regulation of hemopoiesis	0.000111777	0.00292482	8	8	0
BP	GO:0009967	positive regulation of signal transduction	0.000119758	0.00306079	16	15	1
BP	GO:0002520	immune system development	0.000122741	0.00306573	12	12	0
BP	GO:0051239	regulation of multicellular organismal process	0.000138842	0.00339082	27	22	5
BP	GO:0042221	response to chemical	0.000162005	0.00378817	34	30	4
BP	GO:0030098	lymphocyte differentiation	0.000159475	0.00378817	7	7	0
BP	GO:0050778	positive regulation of immune response	0.000168428	0.00385629	11	11	0
BP	GO:0010647	positive regulation of cell communication	0.000172115	0.0038603	16	15	1
BP	GO:0045087	innate immune response	0.000180972	0.00397776	14	14	0
BP	GO:0044767	single-organism developmental process	0.000192227	0.00414229	38	33	5
BP	GO:1990266	neutrophil migration	0.000200081	0.00422863	6	6	0
BP	GO:0023056	positive regulation of signaling	0.000205108	0.00425308	16	15	1
BP	GO:0048518	positive regulation of biological process	0.00020985	0.00427084	38	34	4
BP	GO:0030097	hemopoiesis	0.000218164	0.00435931	11	11	0
BP	GO:2000026	regulation of multicellular organismal development	0.000223464	0.00438549	17	16	1
BP	GO:0044707	single-multicellular organism process	0.000233843	0.00450866	42	36	6
BP	GO:0009306	protein secretion	0.00024561	0.00465389	8	8	0
BP	GO:0010604	positive regulation of macromolecule metabolic process	0.000287124	0.00512465	24	20	4
BP	GO:0051049	regulation of transport	0.000276901	0.00512465	19	15	4
BP	GO:0048534	hematopoietic or lymphoid organ development	0.000279836	0.00512465	11	11	0
BP	GO:0001819	positive regulation of cytokine production	0.000289107	0.00512465	9	9	0
BP	GO:0010033	response to organic substance	0.000299173	0.0052189	28	24	4
BP	GO:0032101	regulation of response to external stimulus	0.000312745	0.00537042	12	11	1
BP	GO:0032502	developmental process	0.0003221	0.00544598	38	33	5
BP	GO:0002697	regulation of immune effector process	0.000350397	0.00566303	8	8	0
BP	GO:0048771	tissue remodeling	0.00034615	0.00566303	6	4	2
BP	GO:0097530	granulocyte migration	0.00034615	0.00566303	6	6	0
BP	GO:0048731	system development	0.000358974	0.00571757	29	25	4
BP	GO:0031325	positive regulation of cellular metabolic process	0.00037347	0.00586348	26	22	4
BP	GO:0007166	cell surface receptor signaling pathway	0.000405334	0.00627412	24	23	1
BP	GO:0048522	positive regulation of cellular process	0.000484163	0.00736231	34	30	4
BP	GO:0002790	peptide secretion	0.000489034	0.00736231	8	8	0
BP	GO:0009893	positive regulation of metabolic process	0.000512041	0.0076045	26	22	4
BP	GO:0043207	response to external biotic stimulus	0.000552815	0.00788191	14	13	1
BP	GO:0051707	response to other organism	0.000552815	0.00788191	14	13	1
BP	GO:0097529	myeloid leukocyte migration	0.000566579	0.00788191	7	7	0
BP	GO:0042089	cytokine biosynthetic process	0.000564346	0.00788191	6	6	0
BP	GO:0042107	cytokine metabolic process	0.000564346	0.00788191	6	6	0
BP	GO:0032879	regulation of localization	0.000689871	0.00947711	23	19	4
BP	GO:0002221	pattern recognition receptor signaling pathway	0.000727424	0.0096318	5	5	0
BP	GO:0002758	innate immune response-activating signal transduction	0.000727424	0.0096318	5	5	0
BP	GO:0042108	positive regulation of cytokine biosynthetic process	0.000727424	0.0096318	5	5	0
BP	GO:0035556	intracellular signal transduction	0.000809339	0.0103699	21	20	1
BP	GO:0031349	positive regulation of defense response	0.000811473	0.0103699	7	7	0
BP	GO:1905952	regulation of lipid localization	0.000811473	0.0103699	7	6	1
BP	GO:0051240	positive regulation of multicellular organismal process	0.000847904	0.0107109	16	15	1
BP	GO:0045637	regulation of myeloid cell differentiation	0.000876327	0.0109441	6	6	0
BP	GO:0009607	response to biotic stimulus	0.000909326	0.0109819	14	13	1
BP	GO:0019216	regulation of lipid metabolic process	0.000899376	0.0109819	8	6	2
BP	GO:0045596	negative regulation of cell differentiation	0.000899376	0.0109819	8	7	1
BP	GO:0046903	secretion	0.000982614	0.011738	13	11	2
BP	GO:0010876	lipid localization	0.000999595	0.0118124	10	8	2
BP	GO:1902533	positive regulation of intracellular signal transduction	0.00103253	0.0120718	12	11	1
BP	GO:0002237	response to molecule of bacterial origin	0.00113321	0.0129729	7	6	1
BP	GO:0032496	response to lipopolysaccharide	0.00113321	0.0129729	7	6	1
BP	GO:0016032	viral process	0.00123444	0.0130217	12	12	0
BP	GO:0002253	activation of immune response	0.00118925	0.0130217	8	8	0
BP	GO:0050900	leukocyte migration	0.00118925	0.0130217	8	8	0
BP	GO:0002218	activation of innate immune response	0.00124411	0.0130217	5	5	0
BP	GO:0002285	lymphocyte activation involved in immune response	0.00124411	0.0130217	5	5	0
BP	GO:0030593	neutrophil chemotaxis	0.00124411	0.0130217	5	5	0
BP	GO:0045089	positive regulation of innate immune response	0.00124411	0.0130217	5	5	0
BP	GO:0045766	positive regulation of angiogenesis	0.00124411	0.0130217	5	5	0
BP	GO:1904018	positive regulation of vasculature development	0.00124411	0.0130217	5	5	0
BP	GO:0032270	positive regulation of cellular protein metabolic process	0.00128639	0.0133372	16	15	1
BP	GO:0032368	regulation of lipid transport	0.00130644	0.0134185	6	5	1
BP	GO:0031328	positive regulation of cellular biosynthetic process	0.0014349	0.0146014	17	13	4
BP	GO:0001934	positive regulation of protein phosphorylation	0.00146819	0.0148032	12	11	1
BP	GO:0050727	regulation of inflammatory response	0.00154743	0.0154602	7	6	1
BP	GO:0030154	cell differentiation	0.00162897	0.0161188	26	23	3
BP	GO:0050793	regulation of developmental process	0.00164268	0.0161188	19	18	1
BP	GO:0042127	regulation of cell proliferation	0.0016753	0.0162934	16	15	1
BP	GO:0042325	regulation of phosphorylation	0.00169414	0.0163322	15	14	1
BP	GO:0048513	animal organ development	0.00173935	0.0164788	21	17	4
BP	GO:0044764	multi-organism cellular process	0.00173754	0.0164788	12	12	0
BP	GO:0002250	adaptive immune response	0.00178081	0.0167275	9	9	0
BP	GO:0048646	anatomical structure formation involved in morphogenesis	0.00183395	0.0170806	11	10	1
BP	GO:0065008	regulation of biological quality	0.00189622	0.0175122	31	24	7
BP	GO:0071702	organic substance transport	0.00193516	0.0177228	22	18	4
BP	GO:0071621	granulocyte chemotaxis	0.00198985	0.017925	5	5	0
BP	GO:1905954	positive regulation of lipid localization	0.00198985	0.017925	5	4	1
BP	GO:0032501	multicellular organismal process	0.00201486	0.0179343	43	37	6
BP	GO:0009891	positive regulation of biosynthetic process	0.00207248	0.0179343	17	13	4
BP	GO:0001775	cell activation	0.00204648	0.0179343	12	12	0
BP	GO:0042327	positive regulation of phosphorylation	0.00204648	0.0179343	12	11	1
BP	GO:0030099	myeloid cell differentiation	0.00207113	0.0179343	7	7	0
BP	GO:0031323	regulation of cellular metabolic process	0.00212897	0.0182792	36	31	5
BP	GO:0007155	cell adhesion	0.00222151	0.0189259	14	12	2
BP	GO:0045893	positive regulation of transcription, DNA-templated	0.00251377	0.020929	13	10	3
BP	GO:1902680	positive regulation of RNA biosynthetic process	0.00251377	0.020929	13	10	3
BP	GO:1903508	positive regulation of nucleic acid-templated transcription	0.00251377	0.020929	13	10	3
BP	GO:0002449	lymphocyte mediated immunity	0.00262989	0.0217312	6	6	0
BP	GO:0000165	MAPK cascade	0.00271448	0.0220009	10	9	1
BP	GO:0045321	leukocyte activation	0.00271448	0.0220009	10	10	0
BP	GO:0009615	response to virus	0.00272258	0.0220009	7	7	0
BP	GO:0022610	biological adhesion	0.00291258	0.0231951	14	12	2
BP	GO:0051254	positive regulation of RNA metabolic process	0.00290002	0.0231951	13	10	3
BP	GO:0042035	regulation of cytokine biosynthetic process	0.00301716	0.0235168	5	5	0
BP	GO:1902105	regulation of leukocyte differentiation	0.00301716	0.0235168	5	5	0
BP	GO:1903708	positive regulation of hemopoiesis	0.00301716	0.0235168	5	5	0
BP	GO:0031401	positive regulation of protein modification process	0.00325505	0.0241709	12	11	1
BP	GO:0044403	symbiosis, encompassing mutualism through parasitism	0.00325505	0.0241709	12	12	0
BP	GO:0044419	interspecies interaction between organisms	0.00325505	0.0241709	12	12	0
BP	GO:0051094	positive regulation of developmental process	0.00325505	0.0241709	12	12	0
BP	GO:0051241	negative regulation of multicellular organismal process	0.00325505	0.0241709	12	9	3
BP	GO:0042110	T cell activation	0.00316916	0.0241709	8	8	0
BP	GO:0043410	positive regulation of MAPK cascade	0.00316916	0.0241709	8	7	1
BP	GO:0033993	response to lipid	0.00358758	0.026111	11	9	2
BP	GO:0031331	positive regulation of cellular catabolic process	0.00358219	0.026111	6	5	1
BP	GO:0050708	regulation of protein secretion	0.00358219	0.026111	6	6	0
BP	GO:0032268	regulation of cellular protein metabolic process	0.00374129	0.0270505	22	21	1
BP	GO:0015031	protein transport	0.00377257	0.0270984	14	12	2
BP	GO:0033036	macromolecule localization	0.00380928	0.0271844	21	17	4
BP	GO:0051046	regulation of secretion	0.00385748	0.0273508	10	8	2
BP	GO:0043408	regulation of MAPK cascade	0.00400293	0.0280205	9	8	1
BP	GO:0046649	lymphocyte activation	0.00400293	0.0280205	9	9	0
BP	GO:0010557	positive regulation of macromolecule biosynthetic process	0.00427499	0.0297126	14	11	3
BP	GO:0045595	regulation of cell differentiation	0.004361	0.0297126	13	12	1
BP	GO:0002366	leukocyte activation involved in immune response	0.00437984	0.0297126	5	5	0
BP	GO:0002685	regulation of leukocyte migration	0.00437984	0.0297126	5	5	0
BP	GO:0045088	regulation of innate immune response	0.00437984	0.0297126	5	5	0
BP	GO:0080090	regulation of primary metabolic process	0.00442431	0.0298302	34	30	4
BP	GO:0048869	cellular developmental process	0.00445768	0.0298719	26	23	3
BP	GO:0015850	organic hydroxy compound transport	0.00448705	0.0298865	7	6	1
BP	GO:0032940	secretion by cell	0.00455739	0.0301721	10	9	1
BP	GO:0015833	peptide transport	0.00483086	0.0306913	14	12	2
BP	GO:0040011	locomotion	0.00483086	0.0306913	14	13	1
BP	GO:0045184	establishment of protein localization	0.00483086	0.0306913	14	12	2
BP	GO:1902531	regulation of intracellular signal transduction	0.00483086	0.0306913	14	13	1
BP	GO:0006869	lipid transport	0.0048313	0.0306913	8	6	2
BP	GO:0051223	regulation of protein transport	0.0048313	0.0306913	8	8	0
BP	GO:0009896	positive regulation of catabolic process	0.00476964	0.0306913	6	5	1
BP	GO:0008283	cell proliferation	0.00487249	0.0307751	16	15	1
BP	GO:0080134	regulation of response to stress	0.00498974	0.0313355	12	11	1
BP	GO:0019222	regulation of metabolic process	0.00510538	0.0318796	36	31	5
BP	GO:0019538	protein metabolic process	0.00533593	0.0330577	41	37	4
BP	GO:0023014	signal transduction by protein phosphorylation	0.00535421	0.0330577	10	9	1
BP	GO:0042886	amide transport	0.00544428	0.033426	14	12	2
BP	GO:0001932	regulation of protein phosphorylation	0.00563176	0.0342528	13	12	1
BP	GO:0002683	negative regulation of immune system process	0.00564128	0.0342528	7	7	0
BP	GO:0070201	regulation of establishment of protein localization	0.00588028	0.0355078	8	8	0
BP	GO:0010628	positive regulation of gene expression	0.00611947	0.0356271	14	11	3
BP	GO:0002443	leukocyte mediated immunity	0.00622421	0.0356271	6	6	0
BP	GO:0002764	immune response-regulating signaling pathway	0.00622421	0.0356271	6	6	0
BP	GO:0002791	regulation of peptide secretion	0.00622421	0.0356271	6	6	0
BP	GO:0030595	leukocyte chemotaxis	0.00622421	0.0356271	6	6	0
BP	GO:0032944	regulation of mononuclear cell proliferation	0.00622421	0.0356271	6	6	0
BP	GO:0050670	regulation of lymphocyte proliferation	0.00622421	0.0356271	6	6	0
BP	GO:1903037	regulation of leukocyte cell-cell adhesion	0.00622421	0.0356271	6	6	0
BP	GO:0002263	cell activation involved in immune response	0.0061316	0.0356271	5	5	0
BP	GO:0045765	regulation of angiogenesis	0.0061316	0.0356271	5	5	0
BP	GO:0044765	single-organism transport	0.00651678	0.0367279	26	22	4
BP	GO:1901700	response to oxygen-containing compound	0.00646561	0.0367279	15	12	3
BP	GO:0016477	cell migration	0.0065115	0.0367279	12	12	0
BP	GO:0009617	response to bacterium	0.00678246	0.0378372	9	8	1
BP	GO:0098542	defense response to other organism	0.00678246	0.0378372	9	8	1
BP	GO:0006935	chemotaxis	0.00709494	0.0378511	8	7	1
BP	GO:0042330	taxis	0.00709494	0.0378511	8	7	1
BP	GO:0090087	regulation of peptide transport	0.00709494	0.0378511	8	8	0
BP	GO:0002687	positive regulation of leukocyte migration	0.00699816	0.0378511	4	4	0
BP	GO:0002688	regulation of leukocyte chemotaxis	0.00699816	0.0378511	4	4	0
BP	GO:0002708	positive regulation of lymphocyte mediated immunity	0.00699816	0.0378511	4	4	0
BP	GO:0009612	response to mechanical stimulus	0.00699816	0.0378511	4	4	0
BP	GO:0019915	lipid storage	0.00699816	0.0378511	4	4	0
BP	GO:0034341	response to interferon-gamma	0.00699816	0.0378511	4	4	0
BP	GO:0007186	G-protein coupled receptor signaling pathway	0.00718539	0.0381485	13	11	2
BP	GO:0045944	positive regulation of transcription from RNA polymerase II promoter	0.00727445	0.0384357	10	9	1
BP	GO:0071705	nitrogen compound transport	0.00740118	0.0389182	16	14	2
BP	GO:0051704	multi-organism process	0.00799709	0.041262	22	21	1
BP	GO:0030334	regulation of cell migration	0.00798081	0.041262	9	9	0
BP	GO:0007159	leukocyte cell-cell adhesion	0.007978	0.041262	6	6	0
BP	GO:0070663	regulation of leukocyte proliferation	0.007978	0.041262	6	6	0
BP	GO:0002822	regulation of adaptive immune response based on somatic recombination of immune receptors built from immunoglobulin superfamily domains	0.00832485	0.0425535	5	5	0
BP	GO:1901342	regulation of vasculature development	0.00832485	0.0425535	5	5	0
BP	GO:0051093	negative regulation of developmental process	0.00849098	0.0432018	8	7	1
BP	GO:0001525	angiogenesis	0.00860072	0.0435585	7	7	0
BP	GO:0006357	regulation of transcription from RNA polymerase II promoter	0.00906385	0.0456934	13	12	1
BP	GO:0006366	transcription from RNA polymerase II promoter	0.0101386	0.0495812	13	12	1
BP	GO:1903530	regulation of secretion by cell	0.0100843	0.0495812	8	7	1
BP	GO:0022407	regulation of cell-cell adhesion	0.0100628	0.0495812	6	6	0
BP	GO:0002821	positive regulation of adaptive immune response	0.0102862	0.0495812	4	4	0
BP	GO:0002824	positive regulation of adaptive immune response based on somatic recombination of immune receptors built from immunoglobulin superfamily domains	0.0102862	0.0495812	4	4	0
BP	GO:0016064	immunoglobulin mediated immune response	0.0102862	0.0495812	4	4	0
BP	GO:0019724	B cell mediated immunity	0.0102862	0.0495812	4	4	0
BP	GO:0034614	cellular response to reactive oxygen species	0.0102862	0.0495812	4	4	0
BP	GO:0050994	regulation of lipid catabolic process	0.0102862	0.0495812	4	3	1
BP	GO:1903409	reactive oxygen species biosynthetic process	0.0102862	0.0495812	4	2	2
CC	GO:0005615	extracellular space	1.4e-08	1.8e-06	30	29	1
CC	GO:0005576	extracellular region	3.77e-05	0.0016192	44	39	5
CC	GO:0044421	extracellular region part	3.35e-05	0.0016192	35	33	2
MF	GO:0005125	cytokine activity	3.78e-09	5.89e-07	17	16	1
MF	GO:0005126	cytokine receptor binding	8.16e-07	6.36e-05	15	15	0
